# Supplementary material for: Translation and validation of the Chinese version of the MD Anderson Symptom Inventory for measuring perioperative symptom burden in patients with gynecologic cancer
Source: Research Square preprint supplement (doi:10.21203/rs.3.rs-265147/v1), 2021-03-11
Supplement: Supplementary file 1 [file 8d157306a69cb423cd3c2cb4.xlsx]

## Sheet: 工作表1
年龄	民族	婚姻状况	职业	文化程度	疾病诊断	临床分期	肿瘤转移	其他疾病	手术方式	曾接受过的治疗	KPS	疼痛	疲劳（乏力	恶心	睡眠不安	苦恼	心慌气短	健忘	胃口	瞌睡（昏昏欲睡）	口干	悲伤感	呕吐	肢体麻木	腹胀/腹部紧绷感	腹部绞痛	便秘	腹泻	头晕	昏昏沉沉/迷迷糊糊	尿频	排尿不能/困难	发热	一般活动	情绪	工作（家务劳动）	与他人关系	走路	生活乐趣	1	2	3	4	5	6	7	8	9	10
52	汉	1	5	3	宫颈腺癌	原位癌	1	1	1	2手术（LEEP)	0	0	1	0	2	2	2	0	0	2	0	1	0	0	0	0	0	0	0	1	0	0	0	0	0	0	0	0	0	1	1	1	2	1	1	2	1	1	2
50	汉	1	1	3	子宫内膜高分化腺癌		1	1	1	1	0	0	0	0	2	1	1	1	0	0	0	0	0	0	1	0	0	0	1	0	0	0	0	0	0	0	0	0	0	2	1	1	2	1	1	1	2	1	2
46	汉	1	5	3	宫颈癌	1期	1	1	1	2手术（LEEP)	0	0	0	0	1	0	0	0	1	0	0	0	0	0	0	0	0	0	1	1	0	0	0	0	0	0	0	0	0	1	1	1	2	1	1	1	1	1	2
56	汉	1	1	4	子宫内膜癌低分化浆液性腺癌	IA1期	1	1	1	1	0	0	0	0	2	0	0	0	0	0	0	2	0	0	0	0	0	0	2	0	0	0	0	0	0	2	0	0	2	1	1	1	2	1	1	2	2	1	2
70	汉	1	2	2	卵巢囊腺癌		1	1	1	1	0	1	1	0	3	2	1	1	1	3	1	2	0	3	4	0	0	0	0	1	0	0	1	1	0	1	0	1	0	2	2	1	2	1	2	2	2	2	3
50	汉	1	5	4	宫颈鳞癌	IA1期	1	1	1	2手术（LEEP)	0	3	2	0	3	2	0	0	0	0	0	0	0	0	1	0	0	0	2	0	0	0	0	0	0	0	0	0	0	1	1	1	1	1	1	1	1	2	2
64	汉	1	2	1	子宫内膜癌低分化膜样腺癌	IA1期	1	1	1	1	0	2	2	0	0	0	2	2	0	3	0	0	0	0	2	0	2	0	0	0	0	0	3	0	0	0	0	0	0	1	1	1	1	1	1	1	2	2	2
46	汉	1	3	3	子宫内膜癌低分化膜样腺癌	IB期	1	1	1	1	0	0	2	0	4	1	0	0	0	1	0	0	0	0	1	0	0	0	0	2	1	0	0	0	0	0	0	0	0	1	1	1	2	1	1	1	1	1	2
57	汉	1	1	4	宫颈鳞癌	IIA1期	1	1	2	1	0	0	2	0	3	2	1	0	0	2	0	1	0	1	0	0	0	0	0	0	0	0	0	0	0	0	0	0	0	1	1	1	1	1	1	2	1	1	2
61	汉	1	2	2	宫颈鳞癌	IB2期	1	2（糖尿病）	2	1	0	2	4	0	2	1	2	2	0	3	1	1	0	0	3	0	2	0	1	1	0	0	0	0	0	0	0	0	0	2	2	1	2	1	2	1	2	1	3
42	汉	1	2	2	宫颈鳞癌	IIA1期	1	1	1	1	0	0	4	0	2	1	2	2	1	4	0	0	0	2	1	0	2	0	0	0	0	1	0	0	0	0	0	0	0	1	2	1	2	1	1	1	1	1	2
42	汉	1	3	3	宫颈鳞癌	IIA1期	1	1	1	3紫+卡1周期	0	0	3	0	5	1	0	0	0	1	0	0	0	0	1	0	4	0	0	0	0	0	0	0	0	0	0	0	0	1	1	1	2	1	1	1	1	1	2
40	汉	3	2	3	宫颈腺癌	IB2期	1	1	2	1	0	0	0	0	0	0	0	0	0	5	0	0	0	0	0	0	1	0	0	0	0	0	0	0	1	0	0	0	0	1	1	1	1	1	1	1	1	1	1
52	汉	1	2	2	卵巢癌	IV期	2LN转移	1	2	3、4、6	2	0	4	0	4	4	0	0	1	2	3	4	0	2	0	0	0	0	1	1	2	0	0	0	3	3	0	0	1	1	1	1	2	1	1	1	1	1	2
32	汉	1	3	5	宫颈低分化鳞癌	IIIC1期	1	1	1	1	0	3	6	3	4	4	0	0	8	0	2	3	0	2	0	0	1	0	3	2	0	0	0	0	2	0	0	0	0	2	2	1	1	1	2	1	2	2	2
46	汉	1	3	3	卵巢低分化浆液性腺癌	IIIC期	2LN转移	1	2	2、3	1	2	6	4	0	2	1	0	3	0	0	4	2	0	7	0	5	0	2	3	4	2	0	0	3	2	0	0	0	2	1	1	2	1	1	1	2	2	2
61	汉	1	2	2	子宫内膜高级别腺癌	IIIC2期	1	2（高血压	2	1	0	2	3	0	5	3	0	0	3	0	0	2	0	0	3	0	0	0	4	0	0	0	0	0	3	0	0	0	0	1	1	1	1	1	1	1	1	2	2
37	汉	1	3	4	宫颈低分化鳞癌	IB2期	1	1	1	2手术（LEEP)	0	1	0	0	3	2	0	3	0	2	0	4	0	0	0	0	0	0	0	2	0	0	0	0	0	0	0	0	0	1	1	1	1	1	1	1	1	2	2
55	汉	1	2	2	子宫内膜腺癌	II期	1	2（高血压、糖尿病）	1	1	0	0	3	0	5	2	0	0	0	0	0	0	0	0	2	0	0	0	0	0	0	0	0	0	0	0	0	0	0	1	1	1	1	1	1	1	1	1	2
42	汉	1	3	4	宫颈鳞癌	IA1期	1	1	1	1	0	0	3	0	8	4	3	3	0	0	0	4	0	2	0	0	3	0	0	4	0	0	0	0	5	0	0	0	0	3	2	2	2	1	1	1	2	1	2
59	汉	1	1	4	卵巢高级别浆液性腺癌		2大网膜转移	2（糖尿病）	2	1	0	2	6	4	0	2	1	0	3	0	0	4	0	0	6	0	2	0	2	0	4	2	0	0	3	0	0	0	0	2	1	1	2	1	1	1	2	2	2
67	汉	1	3	4	宫颈腺癌	IB1期	1	2（糖尿病）	2	1	0	0	5	0	2	1	2	0	1	2	2	1	0	0	0	0	0	0	0	0	0	0	3	0	0	0	0	0	0	2	2	1	2	1	2	2	3	1	2
59	汉	1	2	2	卵巢高级别浆液性腺癌		2LN转移	1	2	3紫+卡5周期	1	0	3	0	5	2	0	0	0	0	1	3	0	1	3	0	1	0	2	2	3	1	0	0	0	0	0	0	0	2	1	1	2	1	2	2	1	1	1
51	汉	1	2	2	卵巢高级别浆液性腺癌		1	1	2	1	0	0	0	0	2	0	0	1	1	0	0	1	0	0	2	0	2	0	0	0	0	0	0	0	0	0	0	0	0	2	1	1	1	1	1	1	1	1	2
41	汉	1	3	4	宫颈腺癌	IIB期	1	1	2	3化疗紫+卡1	0	0	0	0	2	2	0	0	2	0	1	2	0	0	0	0	0	0	0	0	0	0	0	0	0	0	0	0	0	1	1	1	1	1	1	1	1	1	2
48	汉	1	5	3	宫颈鳞癌	IIA2期	1	1	2	3化疗紫+卡3周期	1	0	3	2	5	0	0	0	2	0	0	0	0	0	0	0	2	0	0	0	0	0	0	0	0	0	0	0	0	2	1	1	2	1	1	1	1	1	2
39	汉	1	4	4	卵巢癌		2大网膜转移	1	2	1	0	0	0	0	1	4	0	0	0	0	0	4	0	0	0	0	2	0	0	0	0	0	0	0	0	0	0	0	0	1	1	1	1	1	1	1	1	1	1
64	汉	1	2	2	宫颈低分化鳞癌	IB1期	1	1	2	1	0	0	0	0	3	1	0	0	0	0	0	0	0	0	0	0	2	0	0	0	0	0	0	0	0	0	0	0	0	2	2	1	2	1	1	1	1	1	2
59	汉	1	2	2	卵巢腺癌		1	1	2	3化疗紫+卡1	1	2	6	4	0	0	0	0	5	0	0	2	0	0	5	0	0	0	0	0	2	0	0	0	0	0	0	0	0	1	1	1	1	1	1	1	1	2	2
41	汉	1	3	4	宫颈低分化鳞癌	IIIC1r期	1	1	2	1	0	0	7	3	4	3	0	0	4	0	2	3	0	1	0	0	2	0	0	0	0	2	3	0	4	0	0	0	0	2	1	1	2	1	1	1	1	1	2
48	汉	1	3	3	宫颈鳞癌	IIA1期	1	1	2	1	0	2	3	0	3	0	2	0	0	0	2	0	0	0	0	0	0	0	2	0	0	0	0	0	0	0	0	0	0	1	1	1	1	1	1	1	2	2	2
48	汉	1	4	5	卵巢高级别浆液性腺癌		1	1	2	3紫+卡5周期	1	2	5	3	0	0	0	0	4	2	0	2	0	1	3	0	3	0	0	0	3	0	0	0	0	0	0	0	0	1	1	1	1	1	1	1	1	2	2
39	汉	1	3	4	宫颈中分化鳞癌	IB2期	1	1	2	1	0	0	1	0	3	2	0	0	0	0	0	0	0	0	0	0	0	0	0	0	0	0	0	0	0	0	0	0	0	1	1	1	1	1	1	1	1	1	1
52	汉	1	2	3	卵巢高级别浆液性腺癌	IIIC期	1	1	2	1	0	4	3	0	3	4	2	2	3	0	0	2	0	0	4	0	0	0	0	2	2	0	0	0	1	0	0	0	0	2	1	1	1	1	1	1	2	2	2
57	汉	1	6	2	卵巢高级别浆液性腺癌		1	1	2	3化疗紫+卡3周期	1	2	6	4	0	0	0	0	3	0	0	0	0	0	4	0	2	0	0	0	3	0	0	0	0	0	0	0	0	1	1	1	1	1	1	1	1	2	2
49	汉	1	3	3	宫颈低分化鳞癌	IIA2期	1	1	2	3化疗紫+卡1	1	2	6	0	4	4	0	2	4	0	0	0	0	0	3	0	0	0	0	3	2	7	0	0	4	3	0	0	0	2	1	1	1	1	1	1	2	2	2
52	汉	1	1	5	卵巢低分化浆液性腺癌		1	1	2	3化疗紫+卡3周期	1	3	6	2	0	0	0	0	5	2	0	1	0	0	3	0	0	0	0	0	2	0	0	0	0	0	0	0	0	1	1	1	1	1	1	1	1	2	2
42	汉	1	5	4	宫颈鳞癌	原位癌	1	1	2	2手术（LEEP)	0	0	7	0	5	0	4	2	4	2	0	0	0	0	0	0	0	0	4	2	0	0	0	0	0	2	0	0	0	3	2	2	2	1	1	1	2	1	2
52	汉	1	2	2	子宫内膜高分化腺癌		1	1	2	1	0	2	6	0	5	4	0	2	5	0	0	2	0	0	2	0	0	2	0	0	0	0	0	1	3	1	0	0	0	2	2	2	2	1	1	1	1	2	2
49	汉	1	2	2	卵巢低分化癌	II期	1	1	2	1	0	0	3	0	4	5	2	0	5	3	2	5	0	0	3	0	0	0	0	0	2	0	0	3	6	3	3	0	0	2	2	1	1	1	3	3	2	1	2
45	汉	1	3	3	子宫内膜癌		1	1	1	1	0	0	2	0	5	4	0	0	0	0	0	0	0	0	0	0	2	0	2	0	0	0	0	0	0	0	0	0	0	1	1	1	1	1	1	1	1	1	2
57	汉	1	2	2	子宫内膜高分化腺癌		1	1	1	1	0	0	4	0	3	3	0	0	0	0	0	0	0	0	0	0	0	0	0	0	2	0	0	0	0	0	0	0	0	1	1	1	1	1	1	1	1	1	2
53	汉	1	1	2	宫颈鳞癌	IB1期	1	1	2	1	0	0	3	0	5	0	0	0	3	0	0	0	0	0	5	0	0	0	0	0	0	2	0	0	0	0	0	0	0	1	1	1	1	1	1	1	2	1	2
45	汉	1	3	3	宫颈高分化鳞癌	IB3期	1	1	2	3化疗紫+卡1	0	0	6	2	5	0	0	0	2	0	0	0	0	0	0	0	2	0	0	0	0	0	0	0	0	0	0	0	0	2	1	1	2	1	1	1	1	1	2
44	汉	1	5	4	宫颈低分化鳞癌	IB2期	1	1	1	1	0	2	0	1	2	2	0	0	0	2	0	0	0	0	0	0	0	0	0	0	0	0	0	0	0	0	0	0	0	1	1	1	1	1	1	1	1	1	2
55	汉	1	1	5	宫颈低分化鳞癌	IB1期	1	2（高血压）	2	1	0	0	4	0	3	0	0	0	0	0	0	0	0	0	0	0	0	0	4	3	0	0	0	0	0	0	0	0	0	1	1	1	1	1	1	1	1	2	2
48	汉	1	2	3	宫颈鳞癌	IA1期	1	1	2	2手术（LEEP)	0	0	0	0	2	0	0	0	0	0	0	0	0	0	0	0	2	0	0	0	0	0	0	0	0	0	0	0	0	1	1	1	1	1	1	1	1	1	2
39	汉	1	5	4	宫颈腺癌	IA1期	1	1	2	2手术（LEEP)	0	2	3	3	5	0	0	0	3	0	0	0	0	0	0	0	0	0	0	0	0	0	2	0	0	0	0	0	0	1	1	1	1	1	1	1	1	2	1
45	汉	1	2	3	宫颈低分化腺癌	IB3期	1	1	2	3化疗紫+卡1	0	0	0	4	9	4	0	0	5	0	0	4	0	0	0	0	0	0	0	0	0	2	0	0	4	0	0	0	0	2	2	1	2	1	1	1	1	1	2
54	汉	1	2	2	卵巢腺癌	IIIC期	1	1	2	1	0	0	2	0	5	2	0	0	3	0	0	0	0	0	5	0	0	0	0	0	3	0	0	0	0	0	0	0	0	1	1	1	1	1	1	1	2	1	2
67	汉	4	2	2	卵巢浆液性腺癌		1	1	2	1	0	0	2	0	5	2	2	0	4	0	0	2	0	2	2	2	3	0	0	0	2	0	0	0	0	0	0	0	0	2	1	1	1	1	1	1	1	2	2
45	汉	1	5	3	子宫内膜高分化腺癌		1	1	1	1	0	0	0	0	5	4	0	0	3	0	0	0	0	0	0	0	2	0	2	0	0	0	0	0	0	0	0	0	0	1	1	1	1	1	1	1	1	1	2
65	汉	1	2	2	子宫内膜中分化腺癌		1	1	2	1	0	0	4	0	3	0	0	2	4	0	0	0	0	0	2	0	0	0	0	0	0	2	0	0	0	0	0	0	0	2	2	1	1	1	1	1	2	1	2
50	汉	1	1	4	子宫内膜中分化腺癌	IA1期	1	1	2	1	0	2	4	0	2	2	0	2	2	0	0	0	0	0	2	0	0	0	0	0	0	0	0	0	0	0	0	0	0	1	1	1	1	1	1	1	2	2	2
46	汉	1	3	3	宫颈鳞癌	IA1期	1	1	2	1	0	2	4	0	0	0	0	0	0	0	0	0	0	0	0	2	0	0	0	0	0	0	0	0	0	0	0	0	0	1	1	1	1	1	1	1	1	1	2
51	汉	1	5	3	宫颈鳞癌	原位癌	1	1	2	2手术（LEEP)	0	0	3	0	2	2	0	0	0	0	0	0	0	1	0	0	3	0	0	0	0	0	0	0	0	0	0	0	0	1	1	1	1	1	1	1	1	1	2
62	汉	1	6	2	卵巢癌		1	1	2	1	0	2	5	0	6	2	5	0	4	4	0	2	0	0	4	0	3	0	0	4	0	3	0	1	1	1	0	0	0	3	2	1	2	1	1	1	2	2	2
50	汉	4	6	3	宫颈鳞癌	IB3期	1	1	2	3化疗紫+卡2周期	1	0	6	2	5	0	0	0	4	0	0	2	0	0	0	0	4	0	0	0	0	0	0	0	0	0	0	0	0	2	1	1	2	1	1	1	1	1	2
29	汉	1	6	5	宫颈鳞癌	IA1期	1	1	1	2手术（LEEP)	0	0	0	0	2	0	0	0	0	0	0	0	0	0	0	0	0	0	2	0	0	0	2	0	0	0	0	0	0	1	1	1	1	1	1	1	1	1	2
63	少数藏	1	6	2	宫颈鳞癌	IB1期	1	1	1	1	0	0	7	0	8	4	3	3	0	0	0	4	0	2	0	0	3	0	0	4	0	0	0	0	5	0	0	0	0	3	2	2	2	1	1	1	2	1	2
55	汉	1	1	2	子宫内膜腺癌		1	2（高血压	1	1	0	0	2	0	4	4	0	0	0	0	0	0	0	0	2	0	0	0	0	3	0	0	0	0	0	0	0	0	0	1	1	1	1	1	1	1	1	1	1
43	汉	1	3	3	卵巢高级别浆液性腺癌	IV期	1	1	2	3紫+卡4周期、6	2	3	6	3	8	4	0	0	7	0	2	3	0	2	6	0	1	0	3	2	2	0	0	0	2	0	0	0	0	2	2	1	1	1	2	1	2	2	2
60	汉	1	1	4	宫颈低分化鳞癌	IIA1期	1	1	2	1	0	3	4	0	3	0	0	0	0	0	0	0	0	0	0	0	0	0	4	3	0	0	0	0	0	0	0	0	0	1	1	1	1	1	1	1	1	2	2
50	汉	1	5	3	宫颈低分化鳞癌	IIB1期	2	1	1	3多西他赛+奈达铂	1	0	7	4	9	4	0	0	5	0	0	4	0	0	0	0	0	0	0	0	0	2	0	0	4	0	0	0	0	2	2	1	2	1	1	1	1	1	2
32	汉	3	6	5	宫颈鳞癌	IA1期	1	1	2	2手术（LEEP)	0	2	1	0	2	2	0	0	0	0	0	2	0	0	4	0	0	0	0	0	2	0	0	0	1	0	0	0	0	1	1	1	1	1	1	1	1	2	2
65	汉	1	1	4	宫颈鳞癌	IIA1期	1	2（高血压	2	1	0	0	7	0	5	0	4	2	4	2	0	0	0	0	0	0	0	0	4	2	0	0	0	0	0	2	0	0	0	3	2	2	2	1	1	1	2	1	2
52	汉	2	2	2	子宫内膜透明细胞癌		1	1	1	1	0	2	6	0	5	4	0	2	5	0	0	2	0	0	2	0	0	2	0	0	3	0	0	1	3	1	0	0	0	2	2	2	2	1	1	1	1	2	2
47	汉	1	3	4	宫颈鳞癌	IIA1期	1	1	2	1	0	1	2	0	4	1	0	0	0	0	0	2	0	0	0	0	2	0	0	0	0	0	0	0	0	0	0	0	0	1	1	1	1	1	1	1	1	2	2
56	汉	1	2	2	卵巢低分化浆液性腺癌		1	1	2	3紫+卡4周期	1	0	3	0	5	5	2	0	5	3	2	5	0	0	3	0	0	0	0	0	0	0	0	3	6	3	3	0	0	2	2	1	1	1	3	3	2	1	2
44	汉	3	3	4	子宫内膜中分化腺癌		1	1	2	1	0	0	4	0	3	3	0	0	0	0	0	0	0	0	0	0	0	0	0	0	0	0	0	0	0	0	0	0	0	1	1	1	1	1	1	1	1	1	2
57	汉	2	6	3	卵巢交界性囊腺瘤伴上皮癌		1	1	3单孔	1	0	2	3	0	4	0	2	0	3	0	0	0	0	0	4	0	0	0	0	0	2	0	0	0	0	0	0	0	0	2	1	1	1	1	1	1	2	2	2
52	汉	1	2	2	卵巢腺癌	IV期	2肺	1	2	3紫+卡3周期	1	3	4	0	6	0	4	0	4	0	0	3	0	0	4	0	3	0	2	2	0	0	0	0	2	0	0	0	0	2	1	1	1	1	1	1	1	2	2
56	汉	1	2	2	宫颈鳞癌	IA1期	1	1	2	1	0	2	2	3	5	4	0	2	4	0	0	3	2	0	0	0	0	3	4	3	0	0	0	0	0	0	0	0	0	1	1	1	1	1	1	1	2	2	2
56	汉	1	2	2	宫颈鳞癌	IB1期	1	1	2	1	0	2	2	3	5	4	0	2	4	0	0	0	0	0	0	0	0	0	2	0	0	0	0	0	0	0	0	0	0	2	1	1	1	1	1	1	1	2	2
44	汉	1	3	3	宫颈鳞癌	原位癌	1	1	2	1	0	0	2	0	0	2	0	0	0	2	1	0	0	0	0	0	2	0	0	0	0	0	0	0	0	0	0	0	0	1	1	1	1	1	1	1	1	1	2
48	汉	1	3	3	宫颈中分化鳞癌	IIIC1期	1	1	2	3化疗紫+卡1	0	2	5	1	2	2	0	0	0	2	0	0	0	0	0	0	0	0	0	0	0	0	0	0	0	0	0	0	0	1	1	1	1	1	1	1	1	1	2
47	汉	4	4	5	宫颈鳞癌	IA1期	1	1	2	1	0	3	2	0	3	2	0	0	0	0	0	0	0	0	1	0	0	0	2	0	0	0	0	0	0	0	0	0	0	1	1	1	1	1	1	1	1	2	2
55	汉	1	1	3	宫颈腺癌	原位癌	1	1	1	2手术（LEEP)	0	2	4	3	0	0	0	0	0	0	0	0	0	2	0	0	0	0	0	0	0	0	2	0	0	0	0	0	0	1	1	1	1	1	1	1	1	2	1
54	汉	1	1	4	卵巢高级别浆液性腺癌	IIB期	1	1	2	1	0	0	0	0	5	0	2	0	3	0	0	0	0	2	5	0	0	0	0	0	3	0	0	0	0	0	0	0	0	1	1	1	1	1	1	1	2	1	2
66	汉	1	2	2	子宫内膜高分化腺癌		1	1	1	1	0	2	7	0	4	0	2	2	0	3	0	0	0	1	0	0	0	0	4	1	0	0	0	0	0	0	0	0	0	2	1	1	2	1	1	1	2	2	2
36	汉	1	3	4	宫颈鳞癌	IB1期	1	1	2	1	0	2	3	0	0	2	0	0	0	0	0	3	0	0	0	0	0	0	2	0	2	0	0	0	2	0	0	0	0	1	1	1	1	1	1	1	1	2	2
45	汉	1	6	4	宫颈鳞癌	IIA2期	1	1	2	1	0	0	3	0	4	2	0	0	7	0	2	0	0	0	0	0	2	0	0	0	0	0	0	0	0	0	0	0	0	1	1	1	1	1	1	1	1	1	2
54	汉	1	5	3	卵巢浆液性腺癌	IIIC期	1	2（糖尿病）	2	3紫+卡3周期	1	2	6	4	0	2	1	0	3	0	0	4	0	0	6	0	2	0	2	0	4	2	0	0	3	0	0	0	0	2	1	1	2	1	1	1	2	2	2
52	彝族	1	1	4	宫颈低分化鳞癌	IIIC1期	1	1	2	3紫+卡1周期	0	0	7	3	4	3	0	0	4	0	2	3	0	1	0	0	2	0	0	0	0	2	3	0	4	0	0	0	0	2	1	1	2	1	1	1	1	1	2
44	汉	1	6	4	卵巢腺癌		1	1	2	1	0	2	3	0	4	2	0	0	3	0	0	2	0	0	2	0	2	0	0	0	7	2	0	0	2	0	0	0	0	2	1	1	1	1	1	1	1	2	2
46	汉	1	2	2	宫颈鳞癌	IB2期	1	1	2	1	0	0	4	0	4	0	0	0	0	0	0	0	0	0	0	0	2	0	3	0	0	0	0	0	0	0	0	0	0	1	1	1	1	1	1	1	1	1	2
54	汉	1	1	3	宫颈鳞癌	IA1期	1	1	1	2手术（LEEP)	0	0	0	0	1	2	1	1	0	2	1	1	0	0	0	0	0	0	0	0	0	0	0	0	0	0	0	0	0	1	1	1	1	1	1	1	1	1	2
60	汉	1	2	2	卵巢癌		1	1	2	1	0	0	4	0	3	2	2	1	3	0	0	1	0	0	2	0	2	0	0	0	2	0	0	0	0	0	0	0	0	2	2	1	2	1	1	1	2	1	2
59	汉	1	1	3	宫颈鳞癌	IA1期	1	1	2	2手术（LEEP)	0	0	0	0	2	0	1	2	0	0	0	0	0	0	0	0	0	0	0	0	1	0	0	0	0	0	0	0	0	2	2	1	2	1	1	1	2	1	2
44	汉	1	4	5	宫颈鳞癌	IA1期	1	1	2	2手术（LEEP)	0	0	0	0	7	2	0	0	2	0	0	0	0	0	0	0	0	0	0	0	0	0	0	0	0	0	0	0	0	1	1	1	1	1	1	1	1	1	1
48	汉	1	6	4	宫颈鳞癌	IB1期	1	1	1	1	0	0	2	0	4	4	0	0	0	0	0	0	0	0	0	0	0	0	0	0	0	0	0	0	0	0	0	0	0	1	1	1	1	1	1	1	1	1	2
50	汉	1	5	3	宫颈鳞癌	IB1期	1	1	1	1	0	0	2	0	3	3	0	0	0	0	0	0	0	0	0	0	0	0	0	1	0	0	0	0	0	0	0	0	0	1	1	1	1	1	1	1	1	1	2
55	汉	1	2	3	子宫内膜低分化膜样腺癌		1	1	1	1	0	0	4	0	5	0	2	0	3	0	0	0	0	1	0	0	0	0	0	0	2	0	0	0	0	0	0	0	0	2	1	1	1	1	1	1	2	1	1
43	汉	1	3	3	宫颈鳞癌	IA1期	1	1	3单孔	1	0	0	0	0	4	2	0	0	4	0	0	0	0	0	0	0	0	3	0	0	0	0	0	0	0	0	0	0	0	1	1	1	1	1	1	1	1	1	2
47	汉	1	3	4	卵巢透明细胞癌		1	1	2	1	0	3	8	0	6	3	0	0	5	0	0	3	0	0	5	0	0	0	0	0	4	0	0	0	5	2	0	0	0	2	1	1	1	1	1	1	1	2	2
49	汉	1	3	4	子宫内膜中分化腺癌	IIB期	1	1	2	1	0	2	2	0	4	4	0	0	2	2	0	2	0	1	2	2	0	0	0	0	0	0	0	0	2	0	0	0	0	2	1	1	1	1	1	1	1	1	2
63	汉	1	1	4	宫颈鳞癌	IB1期	1	1	1	1	0	0	0	0	6	0	2	0	3	0	0	0	0	0	0	0	0	0	2	0	0	0	0	0	0	0	0	0	0	2	1	1	1	1	1	1	2	1	1
60	少数藏	1	1	4	宫颈鳞癌	IB2期	1	1	3单孔	1	0	0	2	0	6	0	0	0	5	0	0	0	0	0	0	0	3	0	0	0	0	0	0	0	0	0	0	0	0	2	1	1	1	1	1	1	2	1	1
35	汉	1	3	4	宫颈低分化鳞癌	IIIC1r期	1	1	2	1	0	2	5	2	6	3	0	0	5	0	0	4	0	0	0	0	2	0	0	0	0	0	0	0	3	0	0	0	0	2	1	1	2	1	1	1	1	2	2
63	汉	4	2	2	卵巢交界性囊腺癌		1	1	2	1	0	3	7	0	5	3	3	0	5	0	0	2	0	2	5	0	0	0	3	0	4	1	0	0	2	0	0	0	0	2	1	1	1	1	1	1	2	2	2
64	汉	1	2	3	卵巢腺癌		1	2（高血压	2	1	0	3	8	0	4	4	0	0	9	0	0	5	0	0	7	0	2	0	2	0	3	3	0	2	3	2	0	0	1	2	1	1	2	1	2	2	1	2	2
43	汉	1	3	3	宫颈鳞癌	IA1期	1	1	1	1	0	0	0	0	4	0	0	0	0	2	0	0	0	0	0	0	0	0	0	0	0	0	0	0	0	0	0	0	0	1	1	1	1	1	1	1	1	1	2
63	汉	4	1	4	宫颈鳞癌	IIA1期	1	1	3单孔	1	0	0	2	0	4	0	0	0	5	2	0	0	0	0	0	0	0	0	3	0	0	0	0	0	0	0	0	0	0	2	1	1	1	1	1	1	1	1	2
63	汉	1	6	4	宫颈高分化腺癌	IB1期	1	1	2	1	0	0	2	0	5	3	0	0	2	0	0	0	0	0	0	0	0	0	4	0	0	0	0	0	0	0	0	0	0	2	1	1	1	1	1	1	1	1	2
30	汉	1	4	3	宫颈低分化鳞癌	IB1期	1	1	1	2手术（LEEP)	0	0	5	0	4	4	0	0	0	0	0	2	0	2	0	0	0	0	3	0	0	0	0	0	0	0	0	0	0	2	1	1	1	1	1	1	1	1	2
38	汉	1	3	3	宫颈低分化鳞癌	IB1期	1	1	2	1	0	0	3	0	6	3	0	0	4	0	0	4	0	0	0	0	0	0	0	0	0	0	0	0	3	0	0	0	0	0	1	1	1	1	1	1	1	1	2
54	汉	1	3	3	子宫内膜癌		1	1	3单孔	1	0	2	3	0	5	5	0	0	6	0	0	2	0	0	3	0	0	0	4	0	0	0	0	0	3	0	0	0	0	1	1	1	1	1	1	1	1	2	2
65	汉	1	1	4	宫颈鳞癌	IB1期	1	1	2	1	0	0	5	0	3	0	1	3	0	0	2	0	0	2	0	0	0	0	2	2	2	0	0	0	0	0	0	0	0	2	1	1	1	1	1	1	2	1	2
63	汉	1	2	3	卵巢腺癌		1	1	2	3紫+卡3周期	1	3	6	1	6	4	0	1	5	0	0	2	0	0	4	0	0	0	2	0	2	0	0	0	2	0	0	0	0	2	2	1	1	1	1	1	1	2	2
58	汉	1	2	2	宫颈鳞癌	IB2期	1	1	2	2手术（LEEP)	0	0	4	0	6	2	2	1	4	3	0	2	0	0	0	0	0	0	2	2	0	0	0	0	0	0	0	0	0	2	1	1	1	1	1	1	2	1	2
56	汉	4	1	4	宫颈低分化鳞癌	IIA1期	1	1	1	3紫+卡1周期	0	2	3	1	4	1	1	0	4	0	2	1	0	0	0	0	0	0	0	0	0	0	2	0	0	0	0	0	0	2	1	1	2	1	1	1	2	2	2
65	汉	1	1	4	宫颈鳞癌	IIA1期	1	2（高血压）	1	1	0	0	4	0	3	2	2	0	3	0	0	0	0	0	0	0	0	0	4	2	2	0	0	0	0	0	0	0	0	2	1	1	2	1	1	1	2	1	2
65	汉	1	1	3	宫颈鳞癌	IIB期	1	2（高血压	2	3化疗紫+卡3周期	1	0	5	6	4	3	0	0	7	0	0	3	0	2	5	0	3	0	4	0	8	8	0	2	5	5	0	0	2	2	2	1	2	1	1	2	1	2	2
53	汉	1	1	4	卵巢浆液性腺癌		1	1	2	3紫+卡5周期	2	2	4	3	5	2	0	2	3	0	2	3	0	1	2	0	2	2	2	1	2	0	2	1	3	2	0	0	0	2	2	1	2	1	1	1	2	2	2
47	汉	1	3	3	卵巢浆液性腺癌	IIIC期	1	1	2	1	0	0	4	0	4	2	0	0	4	0	0	2	0	0	2	0	0	0	0	0	0	0	0	0	0	0	0	0	0	1	1	1	1	1	1	1	1	1	2
56	汉	2	1	3	宫颈低分化鳞癌	IB2期	1	2（高血压	1	1	0	0	5	0	4	4	0	0	0	0	0	0	0	2	0	0	0	0	3	3	0	0	0	0	0	0	0	0	0	2	1	1	1	1	1	1	1	1	2
31	汉	1	5	4	宫颈中分化鳞癌	IB1期	1	1	2	2手术（LEEP)	0	2	0	0	7	2	0	0	2	0	0	0	0	0	0	2	0	0	0	0	0	0	0	0	2	0	0	0	0	1	1	1	1	1	1	1	1	2	2
44	汉	1	3	4	卵巢交界性囊腺癌		1	1	2	1	0	0	0	0	3	2	0	0	0	0	0	0	0	1	3	0	0	0	0	0	0	0	0	0	0	0	0	0	0	1	1	1	1	1	1	1	1	1	2
64	汉	1	2	2	卵巢性索间质肿瘤成人粒细胞癌		1	1	2	1	0	4	5	0	5	4	2	2	5	0	2	4	0	2	5	0	0	0	0	2	2	0	0	0	4	0	0	0	2	2	1	1	2	1	1	1	2	2	2
65	汉	4	1	4	卵巢癌		1	1	2	1	0	4	5	2	4	2	2	0	7	0	0	0	0	0	5	0	0	0	0	2	0	0	0	0	2	0	0	0	0	2	1	1	1	1	1	1	1	2	2
50	汉	1	3	3	子宫内膜高分化腺癌		1	1	1	1	0	0	5	0	4	0	0	0	2	0	0	0	0	1	0	0	0	0	0	0	0	0	3	0	0	0	0	0	0	2	2	1	1	1	1	1	1	1	2
40	汉	1	4	5	卵巢高级别浆液性腺癌		1	1	2	1	0	2	0	0	3	0	0	0	0	0	0	2	0	0	3	0	0	0	0	0	5	0	0	0	0	0	0	0	0	1	1	1	1	1	1	1	1	1	2
56	汉	1	2	2	卵巢癌		1	4（高血压、糖尿病）	2	3化疗紫+卡3周期	1	2	6	2	4	1	0	0	3	0	0	0	0	0	4	0	0	0	0	0	2	0	0	0	0	0	0	0	0	1	1	1	1	1	1	1	1	1	1
40	汉	1	3	3	宫颈鳞癌	IB2期	1	1	2	1	0	0	2	0	0	0	0	0	0	0	0	0	0	0	0	0	0	0	0	0	0	0	0	0	0	0	0	0	0	1	1	1	1	1	1	1	1	1	1
55	汉	1	1	3	宫颈鳞癌	IA1期	1	1	1	2手术（LEEP)	0	2	3	0	2	0	0	0	2	2	0	2	0	0	0	0	0	0	0	0	0	0	0	0	0	0	0	0	0	1	1	1	1	1	1	1	1	2	2
69	汉	1	2	2	宫颈鳞癌	IB1期	1	1	2	2手术（LEEP)	0	0	3	0	0	2	1	1	0	2	0	0	0	2	0	0	0	0	2	3	0	0	0	0	0	0	0	0	0	2	1	1	1	1	1	1	2	1	2
51	汉	1	2	3	宫颈鳞癌	IA1期	1	1	1	2手术（LEEP)	0	0	0	0	0	0	0	0	0	0	0	0	0	0	0	0	0	0	0	0	0	0	0	0	0	0	0	0	0	1	1	1	1	1	1	1	1	1	1
68	汉	1	1	4	子宫内膜癌低分化膜样腺癌	II期	1	1	2	1	0	0	5	0	3	2	2	0	0	0	0	0	0	0	2	0	0	0	0	0	0	0	0	0	0	0	0	0	0	2	1	1	1	1	1	1	2	2	2
55	汉	1	2	2	宫颈腺癌	IA1期	1	1	1	2手术（LEEP)	0	0	4	0	4	0	0	1	0	0	1	0	0	0	0	0	0	0	2	0	0	0	0	0	0	0	0	0	0	1	1	1	1	1	1	1	1	2	2
29	汉	1	5	5	子宫内膜癌		1	1	2	1	0	0	2	0	2	0	0	0	0	0	0	2	0	0	2	0	0	0	0	0	2	0	2	0	2	0	0	0	0	1	1	1	1	1	1	1	1	1	1
52	汉	1	2	3	宫颈腺癌	IA1期	1	1	1	2手术（LEEP)	0	0	0	0	4	0	0	0	2	2	0	0	0	1	0	0	2	0	0	0	0	0	0	0	0	0	0	0	0	1	1	1	1	1	1	1	1	1	2
52	汉	1	2	2	宫颈鳞癌	IA1期	1	1	1	1	0	0	4	0	3	0	0	2	0	3	0	0	0	0	0	0	0	0	0	0	0	0	0	0	0	0	0	0	0	1	1	1	1	1	1	1	1	1	2
63	汉	1	2	2	卵巢浆液性腺癌		1	1	2	1	0	3	2	0	3	0	0	0	0	0	0	0	0	0	3	0	0	0	0	0	2	0	0	0	0	0	0	0	0	1	1	1	1	1	1	1	1	1	2
57	汉	1	5	3	卵巢高级别浆液性腺癌		1	1	2	3紫+卡6周期	2	2	7	6	2	4	0	0	3	0	1	4	0	2	4	0	0	0	0	0	1	0	0	0	0	0	0	0	0	1	1	1	2	1	1	1	1	2	2
34	汉	1	6	5	宫颈低分化鳞癌	IB2期	1	1	2	2手术（LEEP)	0	0	3	0	6	0	0	0	0	3	0	0	0	0	0	0	0	0	2	0	0	0	0	0	0	0	0	0	0	1	1	1	1	1	1	1	1	1	2
59	汉	1	1	4	子宫内膜高分化腺癌	II期	1	1	2	1	0	0	5	0	3	0	0	0	0	0	0	0	0	0	5	0	0	0	0	0	3	0	0	0	0	0	0	0	0	1	1	1	1	1	1	1	1	1	2
48	汉	1	3	4	宫颈鳞癌	IIA1期	1	1	2	1	0	2	3	0	3	0	2	0	0	0	2	0	0	0	0	0	0	0	2	0	0	0	0	0	0	0	0	0	0	1	1	1	1	1	1	1	2	2	2
47	汉	1	5	4	宫颈中分化腺癌	IB2期	1	1	2	1	0	0	3	0	5	3	0	0	0	0	0	0	0	0	0	0	0	0	0	0	0	0	0	0	0	0	0	0	0	1	1	1	1	1	1	1	1	1	2
34	汉	1	3	4	宫颈鳞癌	IB3期	1	1	2	3紫+卡1周期	0	0	0	0	2	2	0	0	2	0	1	2	0	0	0	0	0	0	0	0	0	0	0	0	0	0	0	0	0	1	1	1	1	1	1	1	1	1	2
36	汉	1	3	3	宫颈鳞癌	IB1期	1	1	2	1	0	0	0	0	2	0	0	0	0	0	0	0	0	0	0	0	0	0	0	0	0	0	0	0	0	0	0	0	0	1	1	1	1	1	1	1	1	1	1
48	汉	1	3	3	卵巢高级别浆液性腺癌		1	1	2	3紫+卡5周期	2	2	4	0	4	2	0	0	4	0	1	2	0	0	3	0	2	0	0	0	3	0	0	0	1	0	0	0	0	2	1	1	1	1	1	1	1	2	2
60	汉	1	1	5	卵巢浆液性腺癌	IIIC1期	1	2（高血压	2	3紫+卡4周期	1	2	7	2	3	2	0	2	6	0	0	0	0	0	2	0	2	0	0	0	2	0	0	0	2	2	0	0	0	2	1	1	2	1	1	1	1	2	2
44	汉	1	3	4	子宫内膜癌		1	1	2	1	0	0	4	0	4	4	0	0	4	0	0	0	0	0	0	0	0	0	0	0	0	0	0	0	0	0	0	0	0	1	1	1	1	1	1	1	1	1	1
51	汉	1	2	3	卵巢高级别浆液性腺癌	IIIC1期	1	1	2	1	0	4	5	0	4	4	0	0	0	0	0	4	0	2	6	2	0	0	0	0	6	0	0	0	2	0	0	0	0	1	1	1	1	1	1	1	1	2	2
62	汉	1	1	4	卵巢浆液性腺癌		1	2（高血压	2	1	0	4	3	0	3	4	2	2	3	0	0	2	0	0	4	0	0	0	0	2	3	0	0	0	1	0	0	0	0	2	1	1	1	1	1	1	2	2	2
48	汉	1	3	3	宫颈鳞癌	IB1期	1	1	2	1	0	0	0	0	2	2	0	0	0	0	0	0	0	0	0	0	0	0	0	6	0	0	0	0	0	0	0	0	0	1	1	1	1	1	1	1	1	1	1
63	汉	1	1	3	宫颈鳞癌	IA1期	1	1	1	1	0	0	3	0	4	0	0	3	0	0	0	0	0	0	0	0	0	0	2	3	0	0	1	0	0	0	0	0	0	1	1	1	1	1	1	1	1	1	2
53	汉	1	2	2	宫颈低分化鳞癌	IIIC1r期	1	1	2	3紫+卡1周期	1	0	3	0	4	0	0	0	7	0	0	2	0	0	0	0	0	0	0	2	0	0	0	0	0	0	0	0	0	1	1	1	2	1	1	1	1	1	2
32	汉	1	3	4	子宫内膜中分化腺癌	III期	1	1	2	1	0	0	6	0	5	4	0	0	0	0	0	5	0	0	0	0	0	0	2	0	0	0	0	0	3	0	0	0	0	1	1	1	1	1	1	1	1	1	2
68	汉	1	1	3	卵巢腺癌		1	1	2	3紫+卡3周期	1	4	6	4	4	4	0	0	8	0	3	3	0	0	5	0	0	0	0	0	4	2	0	0	2	2	0	0	0	2	1	1	1	1	1	2	1	2	2
48	汉	1	3	3	卵巢高级别浆液性腺癌	IV期	2大网膜转移	1	2	3紫+卡7周期	2	0	5	2	4	6	4	0	5	0	0	5	0	2	6	0	0	3	2	0	4	0	4	0	4	2	0	0	0	1	1	1	1	1	2	2	2	2	2
51	汉	1	3	3	子宫内膜高分化腺癌		1	1	2	1	0	0	3	0	4	2	0	0	0	0	0	0	0	0	0	0	0	0	0	0	0	0	0	0	0	0	0	0	0	1	1	1	1	1	1	1	1	1	2
55	汉	1	2	2	卵巢高级别浆液性腺癌	IIIC期	1	1	2	3紫+卡3周期	0	2	6	4	0	0	0	0	5	2	0	3	0	2	4	0	0	6	0	0	2	0	0	0	0	0	0	0	0	1	1	1	1	1	1	1	1	2	2
56	汉	1	1	4	卵巢低分化癌		1	1	2	1	0	4	5	0	3	3	0	0	2	0	0	2	0	0	3	2	0	0	0	0	2	0	0	0	0	0	0	0	0	1	1	1	1	1	1	1	1	2	2
53	汉	1	3	3	卵巢腺癌	IIIC期	1	1	2	3紫+卡2周期	0	2	7	3	9	4	0	0	6	0	1	5	0	2	4	0	0	0	4	2	2	0	0	0	2	2	0	0	0	2	2	1	1	1	1	1	1	2	2
46	汉	1	2	3	子宫内膜高分化腺癌	IA期	1	2（糖尿病）	2	1	0	4	5	0	9	5	0	0	4	0	0	5	0	0	3	0	0	0	0	0	3	0	0	0	4	0	0	0	0	2	1	1	2	1	1	1	1	2	2
52	汉	1	1	3	子宫内膜癌低分化膜样腺癌		1	1	3单孔	1	0	0	2	0	4	2	0	0	5	0	0	3	0	0	0	0	0	0	0	0	0	0	0	0	0	0	0	0	0	1	1	1	1	1	1	1	1	1	1
30	汉	1	5	4	宫颈高分化腺癌	IB2期	1	1	2	1	0	0	0	0	4	4	0	0	3	0	0	6	0	0	0	0	0	0	0	0	0	0	2	0	4	1	0	0	0	1	1	1	1	1	1	1	1	1	1
55	汉	1	2	3	子宫内膜癌		1	1	2	1	0	2	3	0	4	3	1	2	3	0	1	2	0	0	0	0	2	0	0	0	2	0	0	0	0	0	0	0	0	2	1	1	1	1	1	1	1	2	2
56	汉	1	2	2	宫颈低分化鳞癌	IIA1期	1	1	2	1	0	0	3	0	4	2	0	3	2	0	1	2	0	1	0	0	0	0	2	2	0	0	0	0	0	0	0	0	0	1	1	1	1	1	1	1	1	1	2
25	汉	1	5	5	卵巢癌		1	1	2	1	0	0	0	0	5	4	0	0	6	0	0	4	0	0	0	0	0	0	0	0	1	0	0	0	3	0	0	0	0	1	1	1	1	1	1	1	1	1	1
52	汉	1	2	1	宫颈高分化鳞癌	IB2期	1	1	2	1	0	0	4	0	0	0	0	0	0	0	0	0	0	0	0	0	0	2	0	0	0	0	0	0	0	0	0	0	0	1	1	1	1	1	1	1	1	1	2
45	汉	1	3	3	子宫内膜癌		1	1	1	1	0	0	5	0	4	2	0	0	2	0	0	2	0	0	0	0	0	0	0	0	0	0	0	0	0	0	0	0	0	1	1	1	1	1	1	1	1	1	2
74	汉	1	1	3	宫颈腺癌	IA1期	1	1	1	1	0	0	2	0	2	0	3	1	2	0	0	0	0	0	0	0	0	0	3	0	0	0	0	0	0	0	0	0	0	2	2	1	1	1	1	1	2	1	2
61	汉	1	1	5	双卵巢高分化浆液性腺癌		1	1	2	1	0	2	3	0	2	2	1	0	0	0	0	0	0	0	5	0	0	0	0	0	4	2	0	0	0	0	0	0	0	2	1	1	1	1	1	1	1	2	2
46	汉	1	3	3	宫颈低分化鳞癌	IB2期	1	1	2	1	0	0	0	0	3	3	0	0	1	0	1	1	0	1	0	0	0	0	0	0	0	0	0	0	0	0	0	0	0	1	1	1	1	1	1	1	1	1	1
54	汉	1	2	2	宫颈低分化鳞癌	IIA2期	1	1	2	3紫+卡1周期	0	0	3	0	2	0	2	2	2	4	0	0	0	2	0	0	2	0	0	1	0	0	0	0	0	2	0	0	0	2	1	1	2	1	1	1	2	1	2
33	汉	1	3	3	宫颈鳞癌	IB1期	1	1	2	1	0	0	1	0	2	2	0	0	0	0	0	0	0	0	0	0	0	0	0	0	0	0	0	0	0	0	0	0	0	1	1	1	1	1	1	1	1	1	1
34	汉	1	5	4	宫颈鳞癌	IB1期	1	1	1	1	0	0	0	0	2	2	0	0	2	0	0	1	0	0	0	0	0	0	0	0	0	0	0	0	0	0	0	0	0	1	1	1	1	1	1	1	1	1	2
55	汉	1	1	4	卵巢腺癌	Ic期	1	1	2	3紫+卡6周期	2	3	4	0	3	3	1	1	8	0	0	2	0	1	4	0	2	0	0	0	3	0	0	0	2	0	0	0	0	2	2	1	2	1	2	2	2	2	2
45	汉	1	3	3	卵巢癌		1	1	2	1	0	2	3	0	3	2	0	0	3	0	0	2	0	0	4	0	0	0	0	0	2	0	0	0	2	0	0	0	0	1	1	1	1	1	1	1	1	2	2
58	汉	1	1	4	卵巢低分化浆液性腺癌	IIIC1期	1	1	2	1	0	2	2	0	4	2	2	2	4	1	0	2	0	0	4	0	0	0	3	2	4	0	0	2	4	0	0	0	0	2	2	1	2	1	2	2	2	2	2
49	汉	1	3	4	子宫内膜癌		1	1	1	1	0	0	3	0	3	1	0	0	0	0	0	0	0	0	0	0	1	0	0	0	0	0	0	0	0	0	0	0	0	1	1	1	1	1	1	1	1	1	2
40	汉	1	3	3	卵巢浆液性腺癌		1	1	2	1	0	2	0	0	3	2	0	0	0	0	0	0	0	0	3	0	1	0	0	0	2	0	0	0	0	0	0	0	0	1	1	1	1	1	1	1	1	2	1
74	汉	1	1	4	卵巢高级别浆液性腺癌		1	1	2	3紫+卡3周期	1	2	4	1	0	2	0	0	2	3	0	0	0	0	4	0	2	0	0	2	2	0	1	0	2	3	0	0	0	2	2	2	2	1	1	1	2	2	2
72	汉	1	2	2	宫颈低分化鳞癌	IB1期	1	1	1	1	0	2	9	4	4	4	4	2	4	4	4	0	4	0	3	0	0	0	0	3	2	7	0	0	4	3	0	0	0	2	1	1	1	1	1	1	2	2	2
45	汉	1	3	3	宫颈鳞癌	IA1期	1	2（糖尿病）	1	2手术（LEEP)	0	2	0	0	3	0	0	0	0	0	0	0	0	3	2	0	0	0	0	0	0	0	0	0	0	0	0	0	0	1	1	1	1	1	1	1	1	2	1
69	汉	1	1	4	卵巢高级别浆液性腺癌		1	1	2	3紫+卡3周期	0	3	7	0	5	3	6	3	9	4	0	0	0	2	6	0	7	0	0	3	5	0	6	0	2	2	0	0	0	2	2	1	1	1	1	1	2	2	2
51	汉	1	2	2	子宫内膜高分化腺癌		1	1	1	1	0	2	0	0	3	0	0	0	0	0	0	0	0	3	2	0	0	0	0	0	0	0	0	0	0	0	0	0	0	1	1	1	1	1	1	1	1	2	1
51	汉	1	2	2	子宫内膜高分化腺癌		1	1	2	1	0	0	4	0	3	0	0	0	0	0	0	2	0	0	0	0	0	0	0	0	0	0	0	0	0	0	0	0	0	2	1	1	1	1	1	1	1	1	2
44	汉	1	5	5	子宫内膜癌		1	1	2	1	0	0	3	0	4	0	0	0	0	0	0	0	0	0	0	0	0	0	0	0	0	0	0	0	0	0	0	0	0	1	1	1	1	1	1	1	1	1	1
65	汉	1	3	4	卵巢癌		1	1	2	3紫+卡3周期	1	1	4	2	4	3	2	0	2	0	0	0	4	0	2	0	4	0	0	0	2	0	0	0	2	0	0	0	0	2	1	1	1	1	1	1	1	2	2
46	汉	1	4	5	卵巢低分化癌		1	1	2	1	0	2	1	0	4	4	0	4	0	0	2	0	2	6	0	0	0	0	0	0	2	0	0	0	0	0	0	0	0	1	1	1	1	1	2	2	1	2	2
54	汉	3	3	3	宫颈低分化鳞癌	IIA1期	1	2（乙肝）	2	1	0	0	4	0	2	0	0	0	0	0	0	0	0	0	0	0	0	0	0	2	0	0	0	0	0	0	0	0	0	1	1	1	1	1	1	1	1	1	2
67	汉	4	1	4	宫颈鳞癌	IB2期	1	1	2	1	1	0	6	0	10	7	0	0	7	0	0	4	0	4	0	0	0	0	2	2	0	0	2	0	3	0	0	0	0	1	1	1	1	1	1	1	1	1	2
46	汉	1	3	3	双卵巢低分化浆液性腺癌		1	1	2	3紫+卡5周期	1	3	4	2	1	4	0	3	0	2	3	0	0	4	0	2	0	0	0	5	2	0	0	2	0	0	0	0	0	1	1	1	1	1	2	2	2	2	2
63	汉	1	1	4	卵巢癌	IIIC1期	2大网膜转移	1	2	3、6	1	0	6	4	5	4	2	0	7	0	2	5	3	2	3	0	0	3	0	0	4	0	0	0	2	0	0	0	0	2	2	1	1	1	1	1	2	2	2
43	汉	1	3	3	子宫内膜高分化腺癌		1	1	1	1	0	0	2	0	4	4	0	0	0	0	2	0	0	3	3	0	0	0	0	0	0	0	0	0	0	0	0	0	0	1	1	1	1	1	1	1	1	2	2
55	汉	1	1	4	卵巢癌		1	1	2	1	2	3	4	0	7	3	5	0	4	0	2	3	0	0	6	0	0	0	0	0	5	4	0	2	0	2	0	0	0	2	2	1	1	1	2	2	2	2	2
67	汉	1	6	3	子宫内膜癌低分化膜样腺癌		1	1	1	1	0	0	0	0	9	4	0	0	6	0	0	3	0	0	0	0	2	0	2	2	0	0	0	0	0	0	0	0	0	2	1	1	1	1	1	1	1	1	2
37	汉	1	5	5	子宫内膜高分化腺癌		1	1	1	1	0	0	2	0	6	3	0	0	5	0	0	6	0	0	2	0	0	0	0	0	0	0	0	0	3	0	0	0	0	1	1	1	1	1	1	1	1	1	2
54	汉	1	6	4	宫颈鳞癌	IB2期	1	1	2	1	0	0	4	0	6	0	0	2	0	3	0	0	0	2	0	0	0	0	2	0	0	0	0	0	0	0	0	0	0	2	1	1	1	1	1	1	1	1	2
49	汉	1	3	4	卵巢癌	IIIC1期	1	1	2	3紫+卡6周期	1	2	6	7	10	5	2	0	8	0	0	2	2	0	3	0	0	0	0	0	3	0	0	0	3	2	0	0	1	1	1	1	2	1	2	2	2	2	3
51	汉	1	2	3	卵巢浆液性腺癌		1	1	2	3紫+卡1周期	1	2	3	2	4	2	0	0	5	0	0	3	0	0	4	0	2	0	0	0	3	0	0	0	0	0	0	0	0	1	1	1	1	1	1	1	1	2	2
40	少数藏	1	5	4	宫颈鳞癌	IB2期	1	1	2	1	0	0	4	0	3	0	0	0	2	0	0	0	0	0	0	0	0	0	0	0	0	0	0	0	0	0	0	0	0	1	1	1	1	1	1	1	1	1	2
53	汉	1	2	2	宫颈鳞癌	IB1期	1	1	1	1	0	0	2	0	4	0	0	0	0	0	0	0	0	0	0	0	0	0	0	0	0	0	0	0	0	0	0	0	0	1	1	1	1	1	1	1	1	1	2
45	汉	2	3	3	宫颈鳞癌	原位癌	1	1	1	1	0	0	0	0	5	2	0	0	0	0	0	0	0	0	0	0	0	0	2	0	0	0	0	0	0	0	0	0	0	1	1	1	1	1	1	1	1	1	2
47	汉	1	5	4	子宫内膜中分化腺癌	1	1	2（乙肝）	2	1	0	2	3	0	3	2	0	0	2	2	0	1	0	0	1	0	0	0	2	2	0	0	0	0	0	0	0	0	0	1	1	1	1	1	1	1	1	2	2
45	汉	1	3	3	宫颈鳞癌	IB3期	1	1	2	2、3	0	0	0	0	4	0	0	0	0	0	1	0	0	0	0	0	0	0	2	0	0	0	2	0	0	0	0	0	0	1	1	1	1	1	1	1	1	1	2
28	汉	1	3	5	子宫内膜高分化腺癌		1	1	2	1	0	0	4	0	3	3	0	0	2	0	0	2	0	0	0	0	0	0	0	0	0	0	0	0	3	0	0	0	0	1	1	1	1	1	1	1	1	1	2
57	汉	1	1	4	宫颈鳞癌	IIA2期	1	1	2	2、3	0	2	2	0	2	2	0	0	0	0	0	0	0	0	0	0	0	0	2	2	0	0	0	0	0	0	0	0	0	1	1	1	1	1	1	1	1	2	2
55	汉	1	1	3	宫颈鳞癌	IIA2期	1	1	2	3紫+卡1周期	0	0	2	0	0	0	0	0	0	0	0	0	0	0	0	0	0	0	0	0	0	0	0	0	0	0	0	0	0	2	1	1	1	1	1	1	1	1	2
65	汉	1	2	2	卵巢癌		1	1	2	3紫+卡4周期	1	2	3	1	4	0	2	0	0	0	0	0	0	2	3	0	1	0	1	1	2	0	0	0	0	0	0	0	0	2	2	1	2	1	1	1	2	2	2
61	汉	1	1	3	宫颈中分化鳞癌	IIA1期	1	1	1	1	0	1	2	0	3	1	0	0	2	0	0	2	0	0	0	0	0	0	0	0	0	0	0	0	0	0	0	0	0	1	1	1	1	1	1	1	1	2	2
64	汉	1	2	2	宫颈腺癌	IA1期	1	1	2	2手术（LEEP)	0	0	3	0	4	0	0	0	3	0	0	0	0	2	0	0	0	2	2	0	0	0	0	0	0	0	0	0	0	1	1	1	1	1	1	1	1	2	2
55	汉	1	1	3	卵巢高级别浆液性腺癌	IV期	2LN转移	1	2	3紫+卡3周期	1	2	4	0	3	2	5	0	2	0	0	2	0	0	4	0	0	3	0	0	2	0	0	2	1	1	0	0	0	3	2	1	2	1	2	2	3	2	2
53	汉	1	5	4	宫颈鳞癌	IIA1期	1	2（高血压	2	2手术（LEEP)	0	0	3	0	3	0	0	0	0	0	0	0	0	0	0	0	0	0	0	0	0	0	0	0	0	0	0	0	0	1	1	1	1	1	1	1	1	1	1
56	汉	1	3	2	卵巢高级别浆液性腺癌		1	2（高血压	2	3紫+卡5周期	1	2	6	7	4	5	2	0	8	0	0	2	2	0	3	0	0	0	0	0	3	2	0	0	3	2	0	0	1	1	1	1	2	1	2	2	2	2	3
64	汉	1	2	2	宫颈鳞癌	IB2期	1	2（高血压	2	1	0	0	6	0	5	3	0	0	7	0	0	4	0	4	0	0	0	0	2	2	0	0	2	0	3	0	0	0	0	1	1	1	1	1	1	1	1	1	2
45	少数藏	1	3	4	宫颈鳞癌	IA1期	1	1	2	1	0	0	2	0	4	0	0	0	2	0	0	0	0	0	3	0	0	0	0	0	0	0	0	0	0	0	0	0	0	1	1	1	1	1	1	1	1	1	2
64	汉	1	1	3	宫颈鳞癌	IA1期	1	1	2	1	0	0	4	0	4	0	0	0	0	0	0	0	0	0	0	0	0	0	0	0	0	0	0	0	0	0	0	0	0	1	1	1	1	1	1	1	1	1	2
53	汉	1	2	2	宫颈鳞癌	IB2期	1	1	1	1	0	0	3	0	6	2	2	0	4	3	0	0	0	0	0	0	0	0	2	0	0	0	0	0	0	0	0	0	0	2	1	1	1	1	1	1	2	1	2
72	汉	1	1	4	宫颈鳞癌	IIA1期	1	1	2	1	0	2	5	1	4	1	2	1	4	0	2	0	0	0	0	0	0	0	0	2	0	0	2	0	0	0	0	0	0	2	1	1	2	1	1	1	2	2	2
39	汉	1	5	5	卵巢癌		1	1	2	3紫+卡3周期	1	3	6	0	8	3	6	3	5	4	0	0	0	2	6	0	7	0	0	3	2	0	6	0	2	2	0	0	0	2	2	1	1	1	1	1	2	2	2
62	汉	1	2	2	子宫内膜癌		1	1	2	1	0	0	0	0	3	0	0	0	0	0	0	0	0	3	2	0	0	0	0	0	0	0	0	0	0	0	0	0	0	1	1	1	1	1	1	1	1	2	1
45	汉	1	3	3	子宫内膜癌		1	1	2	1	0	0	4	0	3	0	0	0	0	0	0	2	0	0	0	0	0	0	0	0	0	0	0	0	0	0	0	0	0	2	1	1	1	1	1	1	1	1	2
49	汉	1	3	3	卵巢高级别浆液性腺癌		1	1	2	3紫+卡3周期	1	2	4	0	3	2	5	0	2	0	0	2	0	0	4	0	7	3	0	0	5	0	0	2	1	1	0	0	0	3	2	1	2	1	2	2	3	2	2
54	彝族	1	5	3	卵巢高级别浆液性腺癌		2LN转移	1	2	3紫+卡6周期	2	0	5	2	4	6	4	0	5	0	0	5	0	2	6	0	0	3	2	0	4	0	4	0	4	2	0	0	0	1	1	1	1	1	2	2	2	2	2
44	汉	1	3	3	宫颈鳞癌	IB2期	1	1	2	1	0	0	1	0	3	2	2	0	3	0	0	0	0	0	0	0	0	0	4	2	0	0	0	0	0	0	0	0	0	2	1	1	2	1	1	1	2	1	2
57	汉	1	3	3	卵巢癌		1	1	2	3紫+卡1周期	1	4	6	6	4	3	0	0	7	0	0	3	4	2	5	0	3	0	4	0	4	2	0	0	2	2	0	0	2	2	2	1	2	1	1	2	1	2	2
48	汉	1	3	3	卵巢高级别浆液性腺癌		1	1	2	3紫+卡3周期	1	3	6	3	8	4	0	0	7	0	2	3	0	2	3	0	1	0	3	2	0	0	0	0	2	0	0	0	0	2	2	1	1	1	2	1	2	2	2
63	汉	1	2	3	子宫内膜低分化膜样腺癌		1	1	1	1	0	0	2	0	4	0	0	0	0	0	2	0	0	3	3	0	0	0	0	0	0	0	0	0	0	0	0	0	0	1	1	1	1	1	1	1	1	2	2
64	汉	1	1	5	卵巢腺癌		1	1	2	3紫+卡3周期	1	1	4	2	4	3	2	0	2	0	0	0	4	0	4	0	4	0	0	0	2	0	0	0	2	0	0	0	0	2	1	1	1	1	1	1	1	2	2
68	汉	1	2	2	宫颈鳞癌	IIA1期	1	1	1	1	0	0	2	0	3	0	0	0	0	0	0	0	0	0	0	0	0	0	2	3	0	0	1	0	0	0	0	0	0	1	1	1	1	1	1	1	1	1	2
44	汉	1	4	5	宫颈鳞癌	IB3期	1	1	2	3紫+卡1周期	0	0	3	0	2	0	0	0	2	4	0	0	0	0	0	0	2	0	0	1	0	0	0	0	0	2	0	0	0	2	1	1	2	1	1	1	2	1	2
45	汉	1	3	3	宫颈鳞癌	IA1期	1	1	1	2手术（LEEP)	0	0	3	0	3	0	0	0	0	3	0	0	0	0	0	0	0	0	0	0	0	0	0	0	0	0	0	0	0	1	1	1	1	1	1	1	1	1	2
46	汉	1	3	4	宫颈低分化鳞癌	IB3期	1	1	1	3化疗紫+卡2周期	0	0	2	0	0	0	0	0	0	0	0	0	0	0	0	0	0	0	0	0	0	0	0	0	0	0	0	0	0	2	1	1	1	1	1	1	1	1	2
49	汉	1	5	4	卵巢浆液性腺癌		1	2（糖尿病）	2	1	0	2	0	0	3	2	0	0	0	0	0	0	0	0	3	0	1	0	0	0	2	0	0	0	0	0	0	0	0	1	1	1	1	1	1	1	1	2	1
53	汉	1	1	4	子宫内膜低分化膜样腺癌		1	1	2	3紫+卡3周期	1	0	4	0	5	0	2	0	3	0	0	0	0	1	0	0	0	0	0	0	2	0	0	0	0	0	0	0	0	2	1	1	1	1	1	1	2	1	1
45	汉	1	3	3	卵巢腺癌		1	1	2	1	1	2	7	3	7	0	0	0	6	0	4	0	0	0	4	0	0	0	0	0	2	0	0	0	0	0	0	0	0	2	1	1	1	1	1	1	1	2	2
48	汉	3	3	4	卵巢腺癌		1	1	2	1	1	2	0	4	6	0	3	0	8	0	0	0	0	0	5	0	0	0	0	0	4	0	0	0	0	0	0	0	0	1	1	1	1	1	1	1	1	2	2
66	汉	1	1	3	子宫内膜高分化腺癌		1	2（糖尿病）	2	1	0	0	4	0	3	3	0	0	2	0	0	2	0	0	0	0	0	0	0	0	0	0	0	0	3	0	0	0	0	1	1	1	1	1	1	1	1	1	2
42	汉	1	3	3	宫颈腺癌	IB2期	1	1	2	1	0	2	2	0	2	2	0	0	0	0	0	0	0	0	0	0	0	0	2	2	0	0	0	0	0	0	0	0	0	1	1	1	1	1	1	1	1	2	2
67	汉	1	1	4	子宫内膜癌		1	1	1	1	0	3	2	0	8	0	0	0	0	0	0	0	0	0	0	0	0	0	0	0	0	0	0	0	0	0	0	0	0	1	1	1	1	1	1	1	1	2	2
57	汉	1	3	3	子宫内膜低分化膜样腺癌		1	1	2	1	0	2	3	0	3	2	0	0	2	2	0	1	0	0	1	0	0	0	2	0	0	0	0	0	0	0	0	0	0	1	1	1	1	1	1	1	1	2	2
67	汉	1	1	5	卵巢癌		1	1	2	1	0	0	5	0	4	0	0	0	0	0	0	0	0	2	4	2	0	0	0	0	0	1	0	0	2	0	0	0	0	1	1	1	1	1	1	1	1	2	2
66	汉	1	2	2	卵巢癌		1	1	2	3紫+卡3周期	1	0	7	0	2	0	0	0	6	0	0	0	3	0	5	0	0	0	4	0	5	0	0	0	0	0	0	0	0	2	1	1	1	1	1	1	1	2	2
63	汉	1	6	3	卵巢浆液性腺癌		2大网膜转移	1	2	3紫+卡7周期	2	2	7	6	2	4	0	0	3	0	1	2	0	2	4	0	0	0	0	0	4	2	0	0	0	0	0	0	0	1	1	1	2	1	1	1	1	2	2
44	汉	1	5	4	卵巢癌		2LN转移	1	2	3化疗紫+卡3周期	1	2	3	0	5	2	0	0	0	0	1	3	0	1	3	0	1	0	2	2	3	1	0	0	0	0	0	0	0	2	1	1	2	1	2	2	1	1	1
44	汉	1	4	4	子宫内膜癌	IIB1期	1	1	2	1	0	3	8	0	8	0	0	0	7	0	0	0	0	0	2	0	0	0	0	0	0	0	0	0	0	0	0	0	0	1	1	1	1	1	1	1	1	2	2
68	汉	1	2	2	卵巢癌		1	1	2	1	1	4	5	0	3	3	0	0	2	0	0	2	0	0	3	2	0	0	0	0	0	0	0	0	0	0	0	0	0	1	1	1	1	1	1	1	1	2	2
50	汉	1	3	3	卵巢浆液性腺癌		1	1	2	3化疗紫+卡3周期	0	2	7	3	9	4	0	0	6	0	1	5	0	2	4	0	0	0	4	2	2	0	0	0	2	2	0	0	0	2	2	1	1	1	1	1	1	2	2
64	汉	1	2	2	宫颈鳞癌	IA1期	1	1	2	2手术（LEEP)	0	0	0	0	3	0	0	0	0	0	0	0	0	3	2	0	0	0	0	0	0	0	0	0	0	0	0	0	0	1	1	1	1	1	1	1	1	1	1
61	汉	1	1	4	卵巢高级别浆液性腺癌		2阴道	1	2	3化疗紫+卡3周期	1	3	7	0	5	3	6	3	9	4	0	0	0	2	6	0	7	0	0	3	3	0	6	0	2	2	0	0	0	2	2	1	1	1	1	1	2	2	2
55	汉	1	2	2	子宫内膜样腺癌		1	1	1	1	0	0	0	0	3	0	0	0	0	0	0	0	0	3	2	0	0	0	0	0	0	0	0	0	0	0	0	0	0	1	1	1	1	1	1	1	1	1	1
56	汉	1	2	3	宫颈鳞癌	IB1期	1	1	2	2手术（LEEP)	0	0	2	0	3	0	2	0	3	0	0	0	0	0	0	0	0	0	4	2	0	0	0	0	0	0	0	0	0	2	1	1	2	1	1	1	2	1	2
46	汉	1	2	3	子宫内膜样腺癌		1	1	1	1	0	2	2	0	10	0	0	0	0	0	0	0	0	0	3	0	0	0	0	0	0	0	0	0	0	0	0	0	0	1	1	1	1	1	1	1	1	1	2
51	汉	1	5	5	宫颈鳞癌	IB3期	1	1	2	3化疗紫+卡2周期	0	0	2	0	3	0	0	0	4	0	0	0	0	0	0	0	0	0	0	0	2	0	0	0	0	0	0	0	0	1	1	1	1	1	1	1	1	1	1
56	汉	1	1	4	宫颈鳞癌	IA2期	1	1	1	2手术（LEEP)	0	0	3	0	2	0	0	0	0	2	0	2	0	0	0	0	0	0	0	0	0	0	0	0	0	0	0	0	0	1	1	1	1	1	1	1	1	1	1
49	汉	1	3	3	子宫内膜高分化腺癌		1	1	2	1	0	2	3	0	4	3	1	2	3	0	1	0	0	0	0	0	2	0	0	0	0	0	0	0	0	0	0	0	0	2	1	1	1	1	1	1	1	2	2
53	汉	1	2	2	子宫内膜低分化膜样腺癌		1	1	2	3紫+卡3周期	1	0	4	0	5	0	2	0	3	0	0	0	0	1	0	0	0	0	0	0	0	0	0	0	0	0	0	0	0	2	1	1	1	1	1	1	2	1	1
64	汉	1	1	4	宫颈鳞癌	IIA2期	1	1	2	3多西他赛+奈达铂	1	0	5	0	4	4	0	0	0	0	0	0	0	2	0	0	0	0	3	3	0	0	0	0	0	0	0	0	0	2	1	1	1	1	1	1	1	1	2
40	汉	1	3	3	宫颈鳞癌	IB1期	1	1	2	1	0	0	0	0	4	2	0	0	2	0	0	0	0	0	0	2	0	0	0	0	0	0	0	0	2	0	0	0	0	1	1	1	1	1	1	1	1	1	1
66	汉	1	2	2	子宫内膜癌		1	2（高血压）	1	1	0	0	0	0	3	2	0	0	0	0	0	0	0	0	1	0	0	0	0	0	0	0	0	0	0	0	0	0	0	1	1	1	1	1	1	1	1	1	2
47	汉	1	3	3	宫颈鳞癌	IA1期	1	1	1	2手术（LEEP)	0	0	2	0	3	2	0	0	0	0	0	0	0	0	0	0	0	0	2	0	0	0	1	0	0	0	0	0	0	1	1	1	1	1	1	1	1	1	2
43	汉	1	3	3	宫颈鳞癌	IA1期	1	1	1	1	0	0	3	0	3	0	0	0	0	3	0	0	0	0	0	0	0	0	0	0	0	0	0	0	0	0	0	0	0	1	1	1	1	1	1	1	1	1	2
55	汉	1	1	4	宫颈腺癌	IB1期	1	2（高血压）	2	1	0	0	0	0	4	0	0	0	3	0	0	0	0	0	0	0	0	0	0	0	0	0	2	0	4	1	0	0	0	1	1	1	1	1	1	1	1	1	1
49	汉	1	3	3	子宫内膜高分化腺癌		1	1	2	1	0	2	3	0	4	3	1	2	3	0	1	0	0	0	0	0	2	0	0	0	0	0	0	0	0	0	0	0	0	2	1	1	1	1	1	1	1	2	2
38	汉	1	5	5	宫颈低分化鳞癌	IB2期	1	1	2	1	0	0	3	0	4	2	0	3	2	0	1	0	0	1	0	0	0	0	2	2	0	0	0	0	0	0	0	0	0	1	1	1	1	1	1	1	1	1	2
67	汉	1	1	4	卵巢癌		1	2（高血压）	2	1	0	2	3	0	5	4	0	0	6	0	0	2	0	0	0	0	0	0	0	0	2	0	0	0	3	0	0	0	0	1	1	1	1	1	1	1	1	2	1
54	汉	1	3	3	子宫内膜中分化腺癌		1	1	2	1	0	0	2	0	3	0	0	2	3	0	0	0	0	0	2	0	0	0	0	0	0	2	0	0	0	0	0	0	0	2	2	1	1	1	1	1	1	1	1
51	汉	1	1	4	子宫内膜高分化腺癌		1	1	2	1	0	0	2	0	2	2	0	2	0	0	0	0	0	0	2	0	0	0	0	0	0	0	0	0	0	0	0	0	0	1	1	1	1	1	1	1	1	1	1
54	汉	1	3	2	卵巢浆液性腺癌		1	1	2	3紫+卡3周期	1	2	8	0	0	0	4	0	6	0	0	0	0	0	3	3	0	0	0	0	3	0	0	0	0	0	0	0	0	1	1	1	1	1	1	1	1	2	2
67	汉	1	4	4	宫颈鳞癌	IA2期	1	1	2	2手术（LEEP)	0	0	2	0	3	0	0	0	0	0	0	0	0	0	0	0	0	0	2	3	0	0	1	0	0	0	0	0	0	1	1	1	1	1	1	1	1	1	1
43	汉	1	3	4	宫颈鳞癌	IB2期	1	1	2	1	0	0	3	0	2	0	0	0	0	0	0	2	0	0	0	0	2	0	0	1	0	0	0	0	0	2	0	0	0	1	1	1	1	1	1	1	1	1	1
49	汉	1	3	3	宫颈鳞癌	IA1期	1	1	2	1	0	0	0	0	3	0	0	0	0	0	0	0	0	0	0	0	0	0	0	0	0	0	0	0	0	0	0	0	0	1	1	1	1	1	1	1	1	1	1
53	汉	1	3	3	卵巢癌	IIIC1期	1	1	2	1	0	2	2	7	10	5	2	0	8	0	0	2	2	0	3	0	0	0	0	0	3	0	0	0	3	2	0	0	1	1	1	1	2	1	2	2	2	2	3
44	汉	2	4	4	卵巢透明细胞癌	IIIC1期	1	1	2	1	0	2	2	2	4	2	0	0	5	0	0	3	0	0	4	0	2	0	0	0	4	0	0	0	0	0	0	0	0	1	1	1	1	1	1	1	1	2	2
52	汉	1	3	3	子宫内膜中分化腺癌		1	1	2	1	0	0	4	0	3	0	0	0	2	0	0	0	0	0	0	0	0	0	0	0	0	0	0	0	0	0	0	0	0	1	1	1	1	1	1	1	1	1	2
53	汉	1	1	4	卵巢癌		1	1	2	3紫+卡5周期	1	2	5	5	7	5	2	0	6	0	0	3	2	0	3	0	0	0	0	0	4	0	0	0	3	2	0	0	1	1	1	1	2	1	2	2	2	2	3
56	汉	1	2	2	卵巢癌		1	1	2	1	1	2	3	2	4	2	0	0	5	0	0	2	0	0	4	0	2	0	0	0	3	0	0	0	0	0	0	0	0	1	1	1	1	1	1	1	1	2	2
47	汉	3	3	3	宫颈低分化鳞癌	IB1期	1	1	2	1	0	0	4	0	3	0	0	0	2	0	0	0	0	0	0	0	0	0	0	0	0	0	0	0	0	0	0	0	0	1	1	1	1	1	1	1	1	1	2
42	汉	1	5	4	宫颈鳞癌	IB3期	1	1	2	3紫+卡1周期	0	0	2	0	4	0	0	0	0	0	0	0	0	0	0	0	0	0	0	0	0	0	0	0	0	0	0	0	0	1	1	1	1	1	1	1	1	1	2
64	汉	1	1	4	子宫内膜样腺癌		1	1	1	1	0	2	7	0	4	0	2	2	0	2	0	0	0	0	0	0	0	0	4	1	0	0	0	0	0	0	0	0	0	2	1	1	2	1	1	1	2	2	2
59	汉	1	2	3	宫颈鳞癌	IIA1期	1	1	2	1	0	2	3	0	0	2	0	0	0	2	0	3	0	0	0	0	0	0	2	0	2	0	0	0	2	0	0	0	0	1	1	1	1	1	1	1	1	2	2
57	汉	1	2	2	宫颈腺癌	IIA1期	1	1	2	1	0	0	3	0	4	2	0	0	7	0	2	0	0	0	0	0	2	0	0	0	0	0	0	0	0	0	0	0	0	1	1	1	1	1	1	1	1	1	2
49	汉	1	3	3	子宫内膜高分化腺癌		1	1	2	1	0	0	3	0	4	3	1	2	3	0	1	0	0	0	0	0	2	0	0	0	0	0	0	0	0	0	0	0	0	2	1	1	1	1	1	1	1	1	2
57	汉	1	3	3	子宫内膜低分化膜样腺癌		1	1	2	3紫+卡1周期	1	2	4	0	5	0	2	0	3	0	0	0	0	1	0	0	0	0	0	0	0	0	0	0	0	0	0	0	0	2	1	1	1	1	1	1	2	2	1
65	汉	1	1	4	卵巢腺癌		1	2（高血压	2	3紫+卡3周期	1	1	4	2	4	3	2	0	2	0	0	0	4	0	4	0	4	0	0	0	3	0	0	0	2	0	0	0	0	2	1	1	1	1	1	1	1	2	2
40	汉	1	4	5	宫颈鳞癌	IA2期	1	1	1	2手术（LEEP)	0	0	2	0	5	0	0	0	0	0	0	0	0	0	0	0	0	0	0	0	0	0	0	0	0	0	0	0	0	1	1	1	1	1	1	1	1	1	2
43	汉	1	5	4	子宫内膜高分化腺癌		1	1	1	1	0	0	0	0	3	0	0	0	0	0	0	0	0	3	2	0	0	0	0	0	0	0	0	0	0	0	0	0	0	1	1	1	1	1	1	1	1	1	1
50	汉	1	3	3	卵巢癌		1	1	2	1	0	2	2	0	0	0	4	0	6	0	0	0	0	0	3	3	0	0	0	0	3	0	0	0	0	0	0	0	0	1	1	1	1	1	1	1	1	2	2
46	汉	1	3	3	宫颈鳞癌	IA1期	1	1	1	1	0	0	2	0	3	0	0	0	0	0	0	0	0	0	0	0	0	0	2	3	0	0	1	0	0	0	0	0	0	1	1	1	1	1	1	1	1	1	1
75	汉	1	1	4	宫颈腺癌	IB1期	1	1	2	1	0	0	3	0	4	0	0	0	0	0	0	0	0	0	0	0	2	0	0	1	0	0	0	0	0	2	0	0	0	1	1	1	1	1	1	1	1	1	1
39	汉	1	5	4	宫颈鳞癌	IIA1期	1	1	1	1	0	0	0	0	3	2	0	0	0	0	0	0	0	0	0	0	0	0	0	0	0	0	0	0	0	0	0	0	0	1	1	1	1	1	1	1	1	1	1
68	少数藏	1	1	4	卵巢浆液性腺癌		1	1	2	3紫+卡3周期	1	2	4	7	10	5	2	0	8	0	0	2	2	0	3	0	0	0	0	0	3	0	0	0	3	2	0	0	1	1	1	1	2	1	2	2	2	2	3
50	汉	1	3	2	子宫内膜癌		1	1	1	1	0	0	2	0	4	0	0	0	2	0	0	0	0	1	0	0	0	0	0	0	0	0	3	0	0	0	0	0	0	2	2	1	1	1	1	1	1	1	2
55	汉	1	3	3	卵巢浆液性腺癌		2大网膜转移	2（高血压	2	3多西他赛+奈达铂4	1	2	4	0	3	0	0	0	0	0	0	2	0	0	3	0	0	0	0	0	5	0	0	0	0	0	0	0	0	1	1	1	1	1	1	1	1	1	2
71	汉	1	1	3	卵巢癌		1	1	2	1	0	2	3	2	6	1	0	0	3	0	0	0	0	0	4	0	0	0	0	0	2	0	0	0	0	0	0	0	0	1	1	1	1	1	1	1	1	1	1
56	汉	1	6	3	宫颈腺癌	IB2期	1	1	2	1	0	0	2	3	5	4	0	2	4	0	0	3	2	0	0	0	0	3	4	3	0	0	0	0	0	0	0	0	0	1	1	1	1	1	1	1	2	1	2
45	汉	1	3	3	宫颈腺癌	IB1期	1	1	2	1	0	0	2	3	5	4	0	2	4	0	0	0	0	0	0	0	0	0	2	0	0	0	0	0	0	0	0	0	0	2	1	1	1	1	1	1	1	1	2
47	汉	1	3	3	宫颈鳞癌	IA1期	1	1	1	2手术（LEEP)	0	0	0	0	0	0	0	0	0	0	0	0	0	0	0	0	0	0	0	0	0	0	0	0	0	0	0	0	0	1	1	1	1	1	1	1	1	1	1
61	汉	1	2	2	子宫内膜癌		1	1	3单孔	1	0	0	0	0	3	2	0	0	0	0	0	0	0	0	2	0	0	0	0	0	0	0	0	0	0	0	0	0	0	2	1	1	1	1	1	1	1	1	1
65	汉	1	1	4	卵巢腺癌		2LN转移	1	2	3紫+卡12周期	2	3	7	6	2	4	0	0	3	0	0	2	0	0	4	0	0	0	0	0	4	2	0	0	0	0	0	0	0	1	1	1	2	1	1	1	1	2	2
46	汉	1	5	4	宫颈低分化鳞癌	IB3期	1	1	2	3化疗紫+卡2周期	1	0	5	0	3	0	1	3	0	0	0	0	0	2	0	0	0	0	2	2	0	0	0	0	0	0	0	0	0	2	1	1	1	1	1	1	1	1	2
58	汉	1	2	2	卵巢交界性囊腺癌		2大网膜转移	1	2	3化疗紫+卡2周期	1	3	6	1	6	4	0	1	5	0	0	2	0	0	4	0	0	0	2	0	2	0	0	0	2	0	0	0	0	2	2	1	1	1	1	1	1	2	2
55	汉	1	1	4	宫颈鳞癌	IB1期	1	1	2	2手术（LEEP)	0	0	3	0	6	0	0	0	0	3	0	0	0	0	0	0	0	0	2	0	0	0	0	0	0	0	0	0	0	1	1	1	1	1	1	1	1	1	2
48	汉	1	4	4	卵巢高级别浆液性腺癌		1	1	2	1	0	0	5	0	3	0	0	0	0	0	0	0	0	0	5	0	0	0	0	0	3	0	0	0	0	0	0	0	0	1	1	1	1	1	1	1	1	1	2
56	汉	1	5	4	宫颈鳞癌	IA1期	1	1	2	1	0	2	3	0	3	0	2	0	0	0	2	0	0	0	0	0	0	0	2	0	0	0	0	0	0	0	0	0	0	1	1	1	1	1	1	1	2	2	2
39	汉	1	5	4	宫颈鳞癌	IB2期	1	1	2	1	0	0	3	0	5	3	0	0	0	0	0	0	0	0	0	0	0	0	0	0	0	0	0	0	0	0	0	0	0	1	1	1	1	1	1	1	1	1	2
53	汉	1	3	2	子宫内膜低分化膜样腺癌		1	1	2	1	0	0	4	0	3	2	2	0	0	0	0	0	0	0	2	0	0	0	0	0	0	0	0	0	0	0	0	0	0	2	1	1	1	1	1	1	2	2	2
50	汉	1	3	3	宫颈鳞癌	IA2期	1	1	2	1	0	0	0	0	4	0	0	1	0	0	1	0	0	0	0	0	0	0	2	0	0	0	0	0	0	0	0	0	0	1	1	1	1	1	1	1	1	1	1
51	汉	1	5	4	子宫内膜高分化腺癌		1	1	2	4	1	0	2	0	5	0	2	0	3	0	0	0	0	1	0	0	0	0	0	0	2	0	0	0	0	0	0	0	0	2	1	1	1	1	1	1	2	1	1
50	少数藏	1	5	3	卵巢高级别浆液性腺癌	IIIA2期	1	1	2	1	1	2	4	3	7	0	0	0	6	0	4	0	0	0	4	0	0	0	0	0	2	0	0	0	0	0	0	0	0	2	1	1	1	1	1	1	1	2	2
56	汉	1	2	2	卵巢交界性囊腺癌	Ic期	1	1	2	1	1	2	0	4	6	0	3	0	8	0	0	0	0	0	5	0	0	0	0	0	4	0	0	0	0	0	0	0	0	1	1	1	1	1	1	1	1	2	2
51	汉	1	5	3	子宫内膜高分化腺癌		1	1	1	1	0	0	2	0	3	3	0	0	2	0	0	2	0	0	0	0	0	0	0	0	0	0	0	0	3	0	0	0	0	1	1	1	1	1	1	1	1	1	2
54	汉	1	3	3	宫颈鳞癌	IIB1期	1	1	2	3化疗紫+卡2周期	0	0	3	0	3	0	0	0	0	0	0	0	0	0	0	0	0	0	0	0	0	0	0	0	0	0	0	0	0	1	1	1	1	1	1	1	1	1	1
54	汉	4	2	2	卵巢癌		1	1	2	1	0	2	2	7	10	5	2	0	8	0	0	2	2	0	3	0	0	0	0	0	3	0	0	0	3	2	0	0	1	1	1	1	1	1	1	1	1	2	3
47	汉	1	3	3	卵巢癌		1	1	2	1	1	0	2	2	4	2	0	0	5	0	0	3	0	0	4	0	2	0	0	0	4	0	0	0	0	0	0	0	0	1	1	1	1	1	1	1	1	1	2
62	汉	1	1	4	宫颈鳞癌	IA1期	1	1	1	1	0	0	0	0	3	0	0	0	0	0	0	0	0	0	0	0	0	0	0	0	0	0	0	0	0	0	0	0	0	1	1	1	1	1	1	1	1	1	1
65	汉	1	4	4	子宫内膜中分化腺癌		1	1	1	1	0	0	5	0	4	0	0	0	2	0	0	0	0	1	0	0	0	0	0	0	0	0	3	0	0	0	0	0	0	2	2	1	1	1	1	1	1	1	2
29	汉	2	5	5	卵巢癌		1	1	2	1	1	2	0	0	3	0	0	0	0	0	0	2	0	0	3	0	0	0	0	0	2	0	0	0	0	0	0	0	0	1	1	1	1	1	1	1	1	1	2
46	汉	1	3	3	子宫内膜癌		1	1	1	1	1	0	2	0	4	4	0	0	0	0	2	0	0	3	3	0	0	0	0	0	0	0	0	0	0	0	0	0	0	1	1	1	1	1	1	1	1	2	2
71	汉	1	1	4	卵巢癌		1	2（高血压、糖尿病）	1	1	2	3	4	0	6	3	5	0	4	0	2	3	0	0	6	0	0	0	0	0	5	4	0	2	0	2	0	0	0	2	2	1	1	1	2	2	2	2	2
56	汉	3	2	2	子宫内膜癌		1	1	1	1	0	0	0	0	4	4	0	0	6	0	0	3	0	0	0	0	2	0	2	2	0	0	0	0	0	0	0	0	0	2	1	1	1	1	1	1	1	1	2
40	汉	1	4	4	子宫内膜癌		1	1	1	1	0	0	2	0	5	3	0	0	5	0	0	6	0	0	2	0	0	0	0	0	0	0	0	0	3	0	0	0	0	1	1	1	1	1	1	1	1	1	2
51	汉	1	3	3	子宫内膜癌		1	1	2	1	1	2	3	0	4	3	1	2	3	0	1	0	0	0	0	0	2	0	0	0	0	0	0	0	0	0	0	0	0	2	1	1	1	1	1	1	1	2	2
44	汉	1	5	4	子宫内膜高分化腺癌	IIIC期	1	1	1	1	1	0	4	0	5	0	2	0	3	0	0	0	0	1	0	0	0	0	0	0	0	0	0	0	0	0	0	0	0	2	1	1	1	1	1	1	2	1	1
67	汉	1	1	4	子宫内膜腺癌	II期	1	1	1	1	0	2	0	0	4	0	0	0	0	0	0	0	0	3	2	0	0	0	0	0	0	0	0	0	0	0	0	0	0	1	1	1	1	1	1	1	1	2	1
45	汉	1	2	3	子宫内膜中分化腺癌	IB3期	1	1	2	1	0	0	3	0	3	0	0	0	0	0	0	2	0	0	0	0	0	0	0	0	0	0	0	0	0	0	0	0	0	2	1	1	1	1	1	1	1	1	2
43	汉	1	3	3	宫颈低分化鳞癌	IIA1期	1	1	2	1	0	0	2	0	5	0	0	0	0	0	0	0	0	0	0	0	0	0	0	0	0	0	0	0	0	0	0	0	0	1	1	1	1	1	1	1	1	1	2
48	汉	1	5	4	子宫内膜高分化腺癌		1	1	1	1	0	0	0	0	3	0	0	0	0	0	0	0	0	3	2	0	0	0	0	0	0	0	0	0	0	0	0	0	0	1	1	1	1	1	1	1	1	1	1
46	汉	1	3	3	宫颈低分化鳞癌	IIIC1期	1	1	2	1	1	0	2	0	0	0	4	0	6	0	0	0	0	0	3	3	0	0	0	0	0	0	0	0	0	0	0	0	0	1	1	1	1	1	1	1	1	1	2
22	汉	2	6	5	卵巢浆液性腺癌		1	1	1	1	0	0	2	0	4	0	0	0	5	2	0	0	0	0	0	0	0	0	3	0	0	0	0	0	0	0	0	0	0	2	1	1	1	1	1	1	1	1	2
[truncated: 134 more columns]
